# Supplementary material for: Autism: reduced connectivity between cortical areas involved in face expression, theory of mind, and the sense of self
Source: PubMed Central journal article supplement — Brain. 2015 Mar 20;138(5):1382–93. doi: 10.1093/brain/awv051 (PMC4407191; doi:10.1093/brain/awv051), 2015-03-20

## **Supplementary Material**

# **Autism: Reduced Functional Connectivity between Cortical Areas Involved in Face Expression, Theory of Mind, and the Sense of Self**

Wei Cheng<sup>1, #</sup> Edmund T. Rolls<sup>2,3, #</sup> Huaging Gu<sup>4, \*</sup> Jie Zhang<sup>1</sup> Jianfeng Feng<sup>1, 2</sup>

1. Centre for Computational Systems Biology, Fudan University, Shanghai, PR China

2. University of Warwick, Department of Computer Science, Coventry CV4 7AL, UK

3. Oxford Centre for Computational Neuroscience, Oxford, UK

4. School of Aerospace Engineering and Applied Mechanics, Tongji University, Shanghai 200092, PR China

**Table S1.** The demographic and clinical characteristics of participants satisfying inclusion criteria.

| Variables                                                                                                                                                                                                                                                                                                                                                                                                                                                                                                                                                                                                                                                                                                                                                                                                                                                                                                                                                                                                                                                                                                                                                                                                                                                                                                                                                                                                                                                       | Number of sites | Number of subjects | Control |        |       | Autism  |       |       | Group comparisons |         |
|-----------------------------------------------------------------------------------------------------------------------------------------------------------------------------------------------------------------------------------------------------------------------------------------------------------------------------------------------------------------------------------------------------------------------------------------------------------------------------------------------------------------------------------------------------------------------------------------------------------------------------------------------------------------------------------------------------------------------------------------------------------------------------------------------------------------------------------------------------------------------------------------------------------------------------------------------------------------------------------------------------------------------------------------------------------------------------------------------------------------------------------------------------------------------------------------------------------------------------------------------------------------------------------------------------------------------------------------------------------------------------------------------------------------------------------------------------------------|-----------------|--------------------|---------|--------|-------|---------|-------|-------|-------------------|---------|
|                                                                                                                                                                                                                                                                                                                                                                                                                                                                                                                                                                                                                                                                                                                                                                                                                                                                                                                                                                                                                                                                                                                                                                                                                                                                                                                                                                                                                                                                 |                 |                    | Sub n   | Mean   | SD    | Sub n   | Mean  | SD    | Statistic         | p value |
| AGE_AT_SCAN                                                                                                                                                                                                                                                                                                                                                                                                                                                                                                                                                                                                                                                                                                                                                                                                                                                                                                                                                                                                                                                                                                                                                                                                                                                                                                                                                                                                                                                     | 16              | 927                | 509     | 16.4   | 7.08  | 418     | 17.17 | 7.97  | -1.55             | 0.12    |
| FIQ                                                                                                                                                                                                                                                                                                                                                                                                                                                                                                                                                                                                                                                                                                                                                                                                                                                                                                                                                                                                                                                                                                                                                                                                                                                                                                                                                                                                                                                             | 16              | 856                | 471     | 110.62 | 11.93 | 385     | 105.7 | 14.16 | 5.44              | <0.001  |
| VIQ                                                                                                                                                                                                                                                                                                                                                                                                                                                                                                                                                                                                                                                                                                                                                                                                                                                                                                                                                                                                                                                                                                                                                                                                                                                                                                                                                                                                                                                             | 12              | 789                | 428     | 111.10 | 12.84 | 361     | 104.5 | 15.87 | 6.43              | <0.001  |
| PIQ                                                                                                                                                                                                                                                                                                                                                                                                                                                                                                                                                                                                                                                                                                                                                                                                                                                                                                                                                                                                                                                                                                                                                                                                                                                                                                                                                                                                                                                             | 13              | 787                | 425     | 107.24 | 12.56 | 362     | 105.3 | 15.17 | 1.89              | 0.058   |
| ADOS_TOTAL                                                                                                                                                                                                                                                                                                                                                                                                                                                                                                                                                                                                                                                                                                                                                                                                                                                                                                                                                                                                                                                                                                                                                                                                                                                                                                                                                                                                                                                      | 13              | 323                | 30      | 1.30   | 1.393 | 293     | 11.64 | 3.761 | /                 | /       |
| ADOS_COMM                                                                                                                                                                                                                                                                                                                                                                                                                                                                                                                                                                                                                                                                                                                                                                                                                                                                                                                                                                                                                                                                                                                                                                                                                                                                                                                                                                                                                                                       | 12              | 301                | 30      | 0.533  | 0.681 | 271     | 3.771 | 1.507 | /                 | /       |
| ADOS_SOCIAL                                                                                                                                                                                                                                                                                                                                                                                                                                                                                                                                                                                                                                                                                                                                                                                                                                                                                                                                                                                                                                                                                                                                                                                                                                                                                                                                                                                                                                                     | 12              | 301                | 30      | 0.766  | 0.971 | 271     | 7.952 | 2.751 | /                 | /       |
| ADOS_STEREO_BEHAV                                                                                                                                                                                                                                                                                                                                                                                                                                                                                                                                                                                                                                                                                                                                                                                                                                                                                                                                                                                                                                                                                                                                                                                                                                                                                                                                                                                                                                               | 8               | 264                | 30      | 0.066  | 0.253 | 234     | 1.995 | 1.532 | /                 | /       |
| ADI_R_SOCIAL_TOTAL_A                                                                                                                                                                                                                                                                                                                                                                                                                                                                                                                                                                                                                                                                                                                                                                                                                                                                                                                                                                                                                                                                                                                                                                                                                                                                                                                                                                                                                                            | 13              | 285                | /       | /      | /     | 285     | 19.84 | 5.620 | /                 | /       |
| ADI_R_VERBAL_TOTAL_BV                                                                                                                                                                                                                                                                                                                                                                                                                                                                                                                                                                                                                                                                                                                                                                                                                                                                                                                                                                                                                                                                                                                                                                                                                                                                                                                                                                                                                                           | 13              | 286                | /       | /      | /     | 286     | 15.82 | 4.618 | /                 | /       |
| ADI_RRB_TOTAL_C                                                                                                                                                                                                                                                                                                                                                                                                                                                                                                                                                                                                                                                                                                                                                                                                                                                                                                                                                                                                                                                                                                                                                                                                                                                                                                                                                                                                                                                 | 13              | 285                | /       | /      | /     | 285     | 6.119 | 2.586 | /                 | /       |
| ADI_R_ONSET_TOTAL_D                                                                                                                                                                                                                                                                                                                                                                                                                                                                                                                                                                                                                                                                                                                                                                                                                                                                                                                                                                                                                                                                                                                                                                                                                                                                                                                                                                                                                                             | 11              | 220                | /       | /      | /     | 220     | 3.195 | 1.272 | /                 | /       |
| Sex (male/female)                                                                                                                                                                                                                                                                                                                                                                                                                                                                                                                                                                                                                                                                                                                                                                                                                                                                                                                                                                                                                                                                                                                                                                                                                                                                                                                                                                                                                                               | 16              | 927                | 424/85  | /      | /     | 367/51  | /     | /     | 3.71              | 0.0541  |
| Handedness (right/others)                                                                                                                                                                                                                                                                                                                                                                                                                                                                                                                                                                                                                                                                                                                                                                                                                                                                                                                                                                                                                                                                                                                                                                                                                                                                                                                                                                                                                                       | 16              | 927                | 458/51  | /      | /     | 359/59  | /     | /     | 3.68              | 0.055   |
| EYE_STATUS_AT_SCAN (open/ closed)                                                                                                                                                                                                                                                                                                                                                                                                                                                                                                                                                                                                                                                                                                                                                                                                                                                                                                                                                                                                                                                                                                                                                                                                                                                                                                                                                                                                                               | 16              | 927                | 369/140 | /      | /     | 306/112 | /     | /     | 0.058             | 0.808   |
| DSM_IV_TR (autism/others)                                                                                                                                                                                                                                                                                                                                                                                                                                                                                                                                                                                                                                                                                                                                                                                                                                                                                                                                                                                                                                                                                                                                                                                                                                                                                                                                                                                                                                       | 14              | 384                | /       | /      | /     | 279/105 | /     | /     | /                 | /       |
| MEDICATION (yes/no)                                                                                                                                                                                                                                                                                                                                                                                                                                                                                                                                                                                                                                                                                                                                                                                                                                                                                                                                                                                                                                                                                                                                                                                                                                                                                                                                                                                                                                             | 12              | 293                | /       | /      | /     | 99/194  | /     | /     | /                 | /       |
| <p><b>Number of sites:</b> The number of sites including the Variables<br/> <b>Number of subjects:</b> The number of subjects including the Variables<br/> <b>Sub n:</b> The number of subjects including the Variables in controls or in the autistic group<br/> <b>AGE_AT_SCAN:</b> Age at time of scan in years<br/> <b>FIQ:</b> Full IQ<br/> <b>VIQ:</b> Verbal IQ<br/> <b>PIQ:</b> Performance IQ<br/> <b>ADOS_TOTAL:</b> Classic Total Autism Diagnostic Observation Schedule (ADOS) Score<br/> <b>ADOS_COMM:</b> Communication Total Subscore of the Classic ADOS<br/> <b>ADOS_SOCIAL:</b> Social Total Subscore of the Classic ADOS<br/> <b>ADOS_STEREO_BEHAV:</b> Stereotyped Behaviors and Restricted Interests Total Subscore of the Classic ADOS<br/> <b>ADI_R_SOCIAL_TOTAL_A:</b> Reciprocal Social Interaction Subscore (A) Total for Autism Diagnostic Interview-Revised (ADI-R)<br/> <b>ADI_R_VERBAL_TOTAL_BV:</b> Abnormalities in Communication Subscore (B) Total for ADI-R<br/> <b>ADI_RRB_TOTAL_C:</b> Restricted, Repetitive, and Stereotyped Patterns of Behavior Subscore (C) Total for ADI-R<br/> <b>ADI_R_ONSET_TOTAL_D:</b> Abnormality of Development Evident at or Before 36 Months Subscore (D) Total for ADI-R<br/> <b>EYE_STATUS_AT_SCAN:</b> Eye Status During Rest Scan<br/> <b>DSM_IV_TR:</b> DSM_IV_TR Diagnostic Category<br/> <b>MEDICATION:</b> Information on use of medications within the month prior to the scan</p> |                 |                    |         |        |       |         |       |       |                   |         |

**Table S2.** The names and abbreviations of the regions of interest (ROIs)

| <b>NO.</b> | <b>Regions</b>                          | <b>Abbr.</b> | <b>NO.</b> | <b>Regions</b>               | <b>Abbr.</b> |
|------------|-----------------------------------------|--------------|------------|------------------------------|--------------|
| 1, 2       | Precentral gyrus                        | PreCG        | 47, 48     | Lingual gyrus                | LING         |
| 3, 4       | Superior frontal gyrus, dorsolateral    | SFGdor       | 49, 50     | Superior occipital gyrus     | SOG          |
| 5, 6       | Orbitofrontal cortex, superior part     | ORBsup       | 51, 52     | Middle occipital gyrus       | MOG          |
| 7, 8       | Middle frontal gyrus                    | MFG          | 53, 54     | Inferior occipital gyrus     | IOG          |
| 9, 10      | Orbitofrontal cortex, middle part       | ORBmid       | 55, 56     | Fusiform gyrus               | FFG          |
| 11, 12     | Inferior frontal gyrus, opercular part  | IFGoperc     | 57, 58     | Postcentral gyrus            | PoCG         |
| 13, 14     | Inferior frontal gyrus, triangular part | IFGtriang    | 59, 60     | Superior parietal gyrus      | SPG          |
| 15, 16     | Orbitofrontal cortex, inferior part     | ORBinf       | 61, 62     | Inferior parietal            | IPL          |
| 17, 18     | Rolandic operculum                      | ROL          | 63, 64     | Supramarginal gyrus          | SMG          |
| 19, 20     | Supplementary motor area                | SMA          | 65, 66     | Angular gyrus                | ANG          |
| 21, 22     | Olfactory cortex                        | OLF          | 67, 68     | Precuneus                    | PCUN         |
| 23, 24     | Superior frontal gyrus, medial          | SFGmed       | 69, 70     | Paracentral lobule           | PCL          |
| 25, 26     | Orbitofrontal cortex, superior medial   | ORBsupmed    | 71, 72     | Caudate nucleus              | CAU          |
| 27, 28     | Gyrus rectus                            | REC          | 73, 74     | Lenticular nucleus, putamen  | PUT          |
| 29, 30     | Insula                                  | INS          | 75, 76     | Lenticular nucleus, pallidum | PAL          |
| 31, 32     | Anterior cingulate & paracingulate gyri | ACG          | 77, 78     | Thalamus                     | THA          |
| 33, 34     | Cingulate & paracingulate gyri          | DCG          | 79, 80     | Heschl gyrus                 | HES          |
| 35, 36     | Posterior cingulate gyrus               | PCG          | 81, 82     | Superior temporal gyrus      | STG          |
| 37, 38     | Hippocampus                             | HIP          | 83, 84     | Temporal pole: superior      | TPOsup       |
| 39, 40     | Parahippocampal gyrus                   | PHG          | 85, 86     | Middle temporal gyrus        | MTG          |
| 41, 42     | Amygdala                                | AMYG         | 87, 88     | Temporal pole: middle        | TPOmid       |
| 43, 44     | Calcarine fissure & surrounding cortex  | CAL          | 89, 90     | Inferior temporal gyrus      | ITG          |
| 45, 46     | Cuneus                                  | CUN          |            |                              |              |

**Table S3.** The result of classification based on the voxel-based ROI-wise analysis.

| <b>Sites</b> | <b>Sensitivity</b> | <b>Specificity</b> | <b>Accuracy</b> |
|--------------|--------------------|--------------------|-----------------|
| Caltech      | 84.21              | 89.47              | 86.84           |
| KKI          | 56.25              | 87.09              | 76.59           |
| Leuven       | 41.37              | 100.00             | 73.01           |
| MaxMun       | 100.00             | 75.00              | 92.30           |
| NYU          | 69.56              | 87.50              | 80.00           |
| OHSU         | 90.90              | 100.00             | 96.15           |
| Olin         | 82.35              | 87.50              | 84.84           |
| Pitt         | 64.28              | 88.88              | 76.36           |
| SBL          | 93.33              | 66.66              | 80.00           |
| SDSU         | 81.81              | 95.45              | 90.90           |
| Stanford     | 100.00             | 94.44              | 95.00           |
| Trinity      | 77.27              | 79.16              | 78.26           |
| UCLA         | 68.29              | 82.22              | 75.58           |
| UM           | 71.42              | 80.51              | 76.69           |
| USM          | 90.38              | 67.50              | 80.43           |
| Yale         | 85.71              | 80.76              | 82.97           |

**Table S4.** Significant regions of interest (ROIs) identified by the first and second dataset in the voxel-based whole brain analysis. We highlighted regions that exhibit abnormalities in three different cases: whole dataset, the first half and the second half.

| ROIs identified by the first split half data |                    |                         |                  |                         |            | ROIs identified by the second split half data |               |                         |                  |                         |            |            |            |
|----------------------------------------------|--------------------|-------------------------|------------------|-------------------------|------------|-----------------------------------------------|---------------|-------------------------|------------------|-------------------------|------------|------------|------------|
| No.                                          | Areas              | Cluster size<br>#Voxels | Peak MA<br>value | Peak MNI<br>coordinates |            | No.                                           | Areas         | Cluster size<br>#Voxels | Peak MA<br>value | Peak MNI<br>coordinates |            |            |            |
| ROI 1                                        | PreCG.L            | 39                      | -195             | -45                     | -15        | 7                                             | <b>ROI 1</b>  | <b>PreCG.R</b>          | <b>29</b>        | <b>108</b>              | <b>33</b>  | <b>-18</b> | <b>54</b>  |
| <b>ROI 2</b>                                 | <b>PreCG.R</b>     | <b>164</b>              | <b>-245</b>      | <b>36</b>               | <b>-24</b> | <b>54</b>                                     | <b>ROI 2</b>  | <b>SFGdor.L</b>         | <b>108</b>       | <b>637</b>              | <b>-18</b> | <b>27</b>  | <b>45</b>  |
| <b>ROI 3</b>                                 | <b>SFGdor.L</b>    | <b>28</b>               | <b>231</b>       | <b>-21</b>              | <b>27</b>  | <b>42</b>                                     | ROI 3         | SFGdor.R                | 73               | -986                    | 24         | 33         | 57         |
| <b>ROI 4</b>                                 | <b>MFG.L</b>       | <b>88</b>               | <b>-307</b>      | <b>-39</b>              | <b>45</b>  | <b>24</b>                                     | <b>ROI 4</b>  | <b>MFG.L</b>            | <b>154</b>       | <b>382</b>              | <b>-39</b> | <b>45</b>  | <b>24</b>  |
| <b>ROI 5</b>                                 | <b>MFG.R</b>       | <b>30</b>               | <b>-482</b>      | <b>51</b>               | <b>48</b>  | <b>3</b>                                      | <b>ROI 5</b>  | <b>MFG.R</b>            | <b>157</b>       | <b>-376</b>             | <b>51</b>  | <b>48</b>  | <b>3</b>   |
| ROI 6                                        | IFGperc.R          | 70                      | -112             | 54                      | 18         | 21                                            | ROI 6         | IFGtriang.L             | 74               | 311                     | -45        | 42         | 9          |
| ROI 7                                        | IFGtriang.R        | 142                     | -470             | 51                      | 45         | 3                                             | ROI 7         | IFGtriang.R             | 53               | -288                    | 51         | 45         | 6          |
| ROI 8                                        | ROL.R              | 22                      | 93               | 66                      | -6         | 12                                            | <b>ROI 8</b>  | <b>SMA.R</b>            | <b>26</b>        | <b>160</b>              | <b>6</b>   | <b>-24</b> | <b>54</b>  |
| ROI 9                                        | SMA.L              | 44                      | -169             | 0                       | 18         | 45                                            | ROI 9         | SFGmed.L                | 51               | -225                    | 0          | 66         | 3          |
| <b>ROI 10</b>                                | <b>SMA.R</b>       | <b>125</b>              | <b>201</b>       | <b>9</b>                | <b>-21</b> | <b>72</b>                                     | ROI 10        | SFGmed.R                | 90               | -296                    | 3          | 63         | 3          |
| <b>ROI 11</b>                                | <b>ORBsupmed.L</b> | <b>26</b>               | <b>-268</b>      | <b>0</b>                | <b>63</b>  | <b>-3</b>                                     | <b>ROI 11</b> | <b>ORBsupmed.L</b>      | <b>80</b>        | <b>-460</b>             | <b>0</b>   | <b>66</b>  | <b>-3</b>  |
| <b>ROI 12</b>                                | <b>ORBsupmed.R</b> | <b>97</b>               | <b>-433</b>      | <b>3</b>                | <b>60</b>  | <b>-3</b>                                     | <b>ROI 12</b> | <b>ORBsupmed.R</b>      | <b>128</b>       | <b>-530</b>             | <b>3</b>   | <b>66</b>  | <b>-3</b>  |
| ROI 13                                       | REC.L              | 31                      | -143             | 0                       | 51         | -18                                           | ROI 13        | REC.L                   | 37               | -203                    | -3         | 51         | -15        |
| ROI 14                                       | REC.R              | 23                      | 260              | 6                       | 57         | -15                                           | ROI 14        | INS.R                   | 31               | 159                     | 45         | 18         | -9         |
| ROI 15                                       | INS.L              | 102                     | -140             | -39                     | 3          | 0                                             | ROI 15        | ACG.L                   | 177              | -361                    | -6         | 42         | 6          |
| ROI 16                                       | INS.R              | 65                      | -102             | 45                      | 15         | -9                                            | ROI 16        | ACG.R                   | 124              | -186                    | 3          | 42         | 3          |
| ROI 17                                       | DCG.L              | 74                      | 470              | 0                       | -39        | 48                                            | ROI 17        | PHG.L                   | 27               | -246                    | -27        | -30        | -15        |
| ROI 18                                       | DCG.R              | 129                     | -330             | 3                       | 15         | 42                                            | <b>ROI 18</b> | <b>PoCG.L</b>           | <b>45</b>        | <b>-205</b>             | <b>-54</b> | <b>-18</b> | <b>51</b>  |
| ROI 19                                       | CAL.L              | 58                      | -421             | -9                      | -63        | 21                                            | <b>ROI 19</b> | <b>PoCG.R</b>           | <b>43</b>        | <b>105</b>              | <b>39</b>  | <b>-21</b> | <b>48</b>  |
| <b>ROI 20</b>                                | <b>CUN.L</b>       | <b>64</b>               | <b>-532</b>      | <b>-9</b>               | <b>-66</b> | <b>24</b>                                     | ROI 20        | IPL.L                   | 28               | -171                    | -57        | -36        | 54         |
| ROI 21                                       | CUN.R              | 40                      | 167              | 18                      | -78        | 27                                            | ROI 21        | SMG.R                   | 105              | -168                    | 57         | -36        | 45         |
| ROI 22                                       | LING.L             | 21                      | 123              | -9                      | -48        | 3                                             | <b>ROI 22</b> | <b>PCUN.L</b>           | <b>57</b>        | <b>-139</b>             | <b>-9</b>  | <b>-57</b> | <b>27</b>  |
| ROI 23                                       | SOG.R              | 87                      | 163              | 18                      | -81        | 30                                            | <b>ROI 23</b> | <b>PCUN.R</b>           | <b>64</b>        | <b>-149</b>             | <b>6</b>   | <b>-54</b> | <b>24</b>  |
| ROI 24                                       | MOG.L              | 55                      | 72               | -27                     | -87        | 18                                            | ROI 24        | CAU.L                   | 37               | 434                     | -12        | -6         | 18         |
| ROI 25                                       | MOG.R              | 28                      | 99               | 30                      | -81        | 27                                            | <b>ROI 25</b> | <b>CAU.R</b>            | <b>24</b>        | <b>243</b>              | <b>15</b>  | <b>-15</b> | <b>21</b>  |
| ROI 26                                       | IOG.L              | 21                      | -89              | -21                     | -90        | -9                                            | ROI 26        | PUT.L                   | 55               | -260                    | -21        | 3          | -6         |
| <b>ROI 27</b>                                | <b>PoCG.L</b>      | <b>415</b>              | <b>-1065</b>     | <b>-54</b>              | <b>-15</b> | <b>48</b>                                     | ROI 27        | PUT.R                   | 39               | -152                    | 24         | 9          | 3          |
| <b>ROI 28</b>                                | <b>PoCG.R</b>      | <b>380</b>              | <b>-498</b>      | <b>39</b>               | <b>-27</b> | <b>54</b>                                     | ROI 28        | PAL.L                   | 23               | -241                    | -21        | 6          | -3         |
| ROI 29                                       | IPL.L              | 46                      | -336             | -51                     | -18        | 39                                            | ROI 29        | PAL.R                   | 27               | -93                     | 21         | 6          | 3          |
| ROI 30                                       | SMG.R              | 49                      | 262              | 60                      | -36        | 42                                            | <b>ROI 30</b> | <b>THA.L</b>            | <b>154</b>       | <b>368</b>              | <b>-9</b>  | <b>-9</b>  | <b>15</b>  |
| <b>ROI 31</b>                                | <b>PCUN.L</b>      | <b>225</b>              | <b>-302</b>      | <b>-9</b>               | <b>-48</b> | <b>9</b>                                      | <b>ROI 31</b> | <b>THA.R</b>            | <b>188</b>       | <b>322</b>              | <b>15</b>  | <b>-12</b> | <b>18</b>  |
| <b>ROI 32</b>                                | <b>PCUN.R</b>      | <b>173</b>              | <b>-362</b>      | <b>6</b>                | <b>-51</b> | <b>27</b>                                     | <b>ROI 32</b> | <b>STG.L</b>            | <b>101</b>       | <b>147</b>              | <b>-54</b> | <b>-24</b> | <b>3</b>   |
| <b>ROI 33</b>                                | <b>PCL.L</b>       | <b>124</b>              | <b>-198</b>      | <b>0</b>                | <b>-24</b> | <b>54</b>                                     | <b>ROI 33</b> | <b>MTG.L</b>            | <b>129</b>       | <b>136</b>              | <b>-54</b> | <b>-27</b> | <b>3</b>   |
| ROI 34                                       | PCL.R              | 77                      | 175              | 12                      | -24        | 72                                            | <b>ROI 34</b> | <b>MTG.R</b>            | <b>37</b>        | <b>-263</b>             | <b>60</b>  | <b>0</b>   | <b>-30</b> |
| <b>ROI 35</b>                                | <b>CAU.R</b>       | <b>52</b>               | <b>761</b>       | <b>15</b>               | <b>-6</b>  | <b>18</b>                                     | ROI 35        | ITG.L                   | 41               | -400                    | -57        | -6         | -30        |
| <b>ROI 36</b>                                | <b>THA.L</b>       | <b>182</b>              | <b>514</b>       | <b>-6</b>               | <b>-18</b> | <b>12</b>                                     | <b>ROI 36</b> | <b>ITG.R</b>            | <b>91</b>        | <b>-305</b>             | <b>48</b>  | <b>-6</b>  | <b>-36</b> |
| <b>ROI 37</b>                                | <b>THA.R</b>       | <b>173</b>              | <b>874</b>       | <b>12</b>               | <b>-6</b>  | <b>12</b>                                     |               |                         |                  |                         |            |            |            |
| <b>ROI 38</b>                                | <b>STG.L</b>       | <b>84</b>               | <b>291</b>       | <b>-54</b>              | <b>6</b>   | <b>-12</b>                                    |               |                         |                  |                         |            |            |            |
| ROI 39                                       | STG.R              | 137                     | -238             | 51                      | -39        | 12                                            |               |                         |                  |                         |            |            |            |
| ROI 40                                       | TPOsup.L           | 35                      | -296             | -54                     | 9          | -15                                           |               |                         |                  |                         |            |            |            |
| ROI 41                                       | TPOsup.R           | 65                      | 505              | 51                      | 9          | -6                                            |               |                         |                  |                         |            |            |            |

|               |              |            |             |            |            |            |  |
|---------------|--------------|------------|-------------|------------|------------|------------|--|
| <b>ROI 42</b> | <b>MTG.L</b> | <b>252</b> | <b>261</b>  | <b>-63</b> | <b>-21</b> | <b>0</b>   |  |
| <b>ROI 43</b> | <b>MTG.R</b> | <b>102</b> | <b>-609</b> | <b>54</b>  | <b>-3</b>  | <b>-27</b> |  |
| ROI 44        | TPOmid.L     | 21         | 146         | -48        | 15         | -30        |  |
| <b>ROI 45</b> | <b>ITG.R</b> | <b>76</b>  | <b>257</b>  | <b>60</b>  | <b>-6</b>  | <b>-30</b> |  |

**Figure S1.** Location of the altered functional network of the voxel-level whole brain association study. The left side of the brain is on the right of each coronal slice. Voxels with overall increased connectivity are in red, and with reduced connectivity in blue.

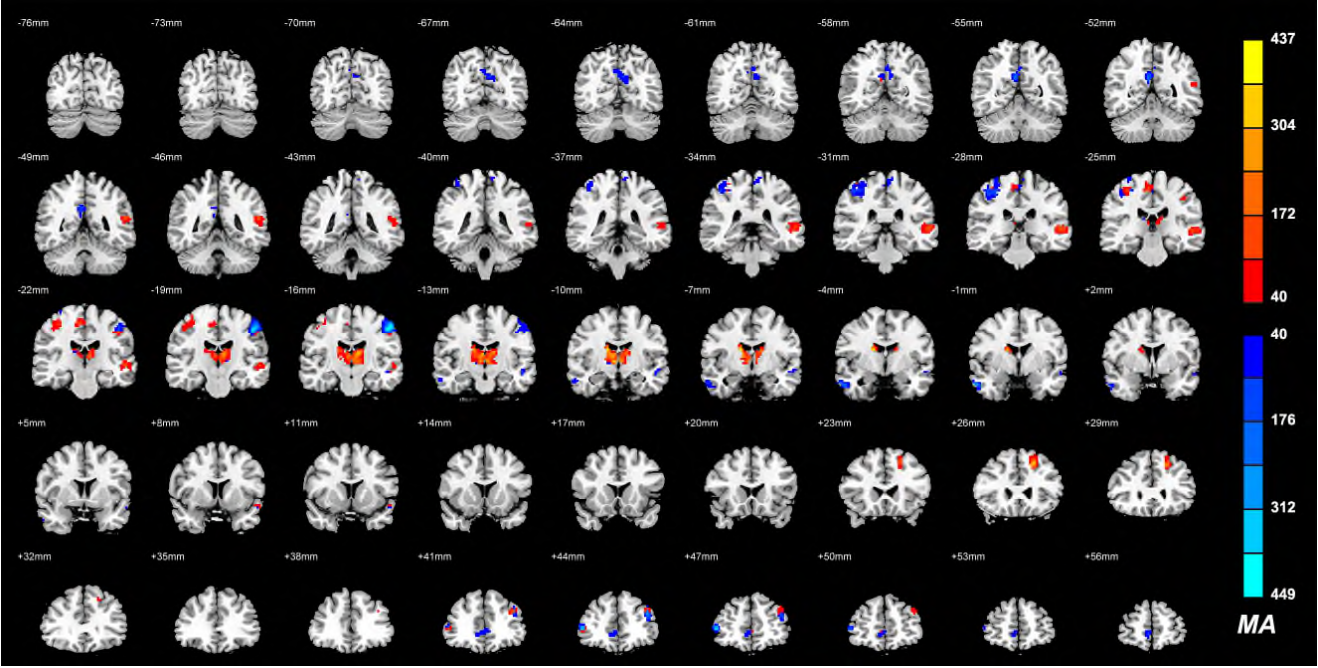

**Figure S2.** Voxels with different functional connectivity in autism (Bonferroni correction, in this case the effect of IQ was not regressed). **A.** Manhattan plot showing the probability values for each link being different in the autistic group compared to the control group. Each dot is a functional connectivity link between two voxels. Note there are a total of  $47636 \times 47635 / 2$  links, and we only plot a dot if  $p < 10^{-5}$ . The red dotted line is the Bonferroni correction threshold  $4.4 \times 10^{-11}$ . The regions indicate the AAL areas in which the voxels were located, with the numbers for each region specified in Table S2. **B.** Location of the voxels that had significantly different altered functional connectivity with other voxels (using whole brain Bonferroni correction). The color bar represents the measure of association (MA, see text) given by the number of significantly affected links relating to each voxel. Voxels that had functional connectivities in the autism population that were weaker than in controls are shown in blue, and that had stronger functional connectivity in the autism population are shown in red. Five main groups of voxels are evident, in the middle temporal gyrus (MTG), ventromedial prefrontal cortex (ORBsupmed), precuneus (PCUN) and paracentral lobule (PCL), the post- and pre-central cortex (PoCG and PreCG), and a medial region of the thalamus (THA). SFGmed - superior frontal gyrus, medial part.

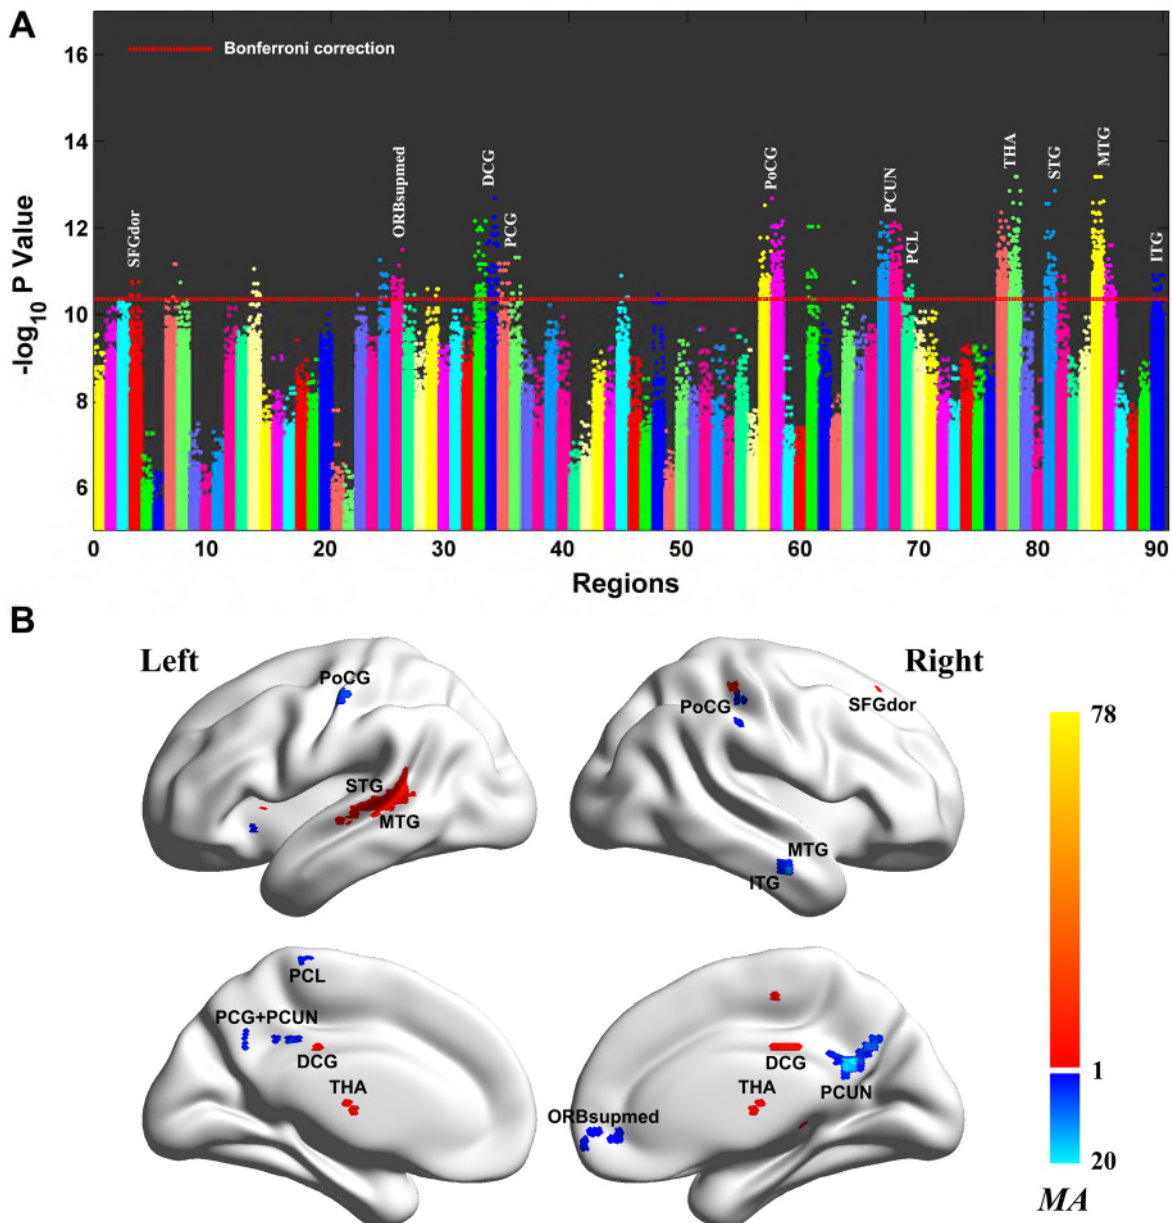



**Figure S3.** The locations of all voxels in the brain that have significantly different functional connectivities between the autistic and the control population for both datasets (FDR correction, 0.05,  $MA > 40$ , cluster size  $> 30$  voxels for the first half and the second half dataset). We highlighted regions that exhibit abnormalities in three different cases: whole dataset, the first half and the second half.

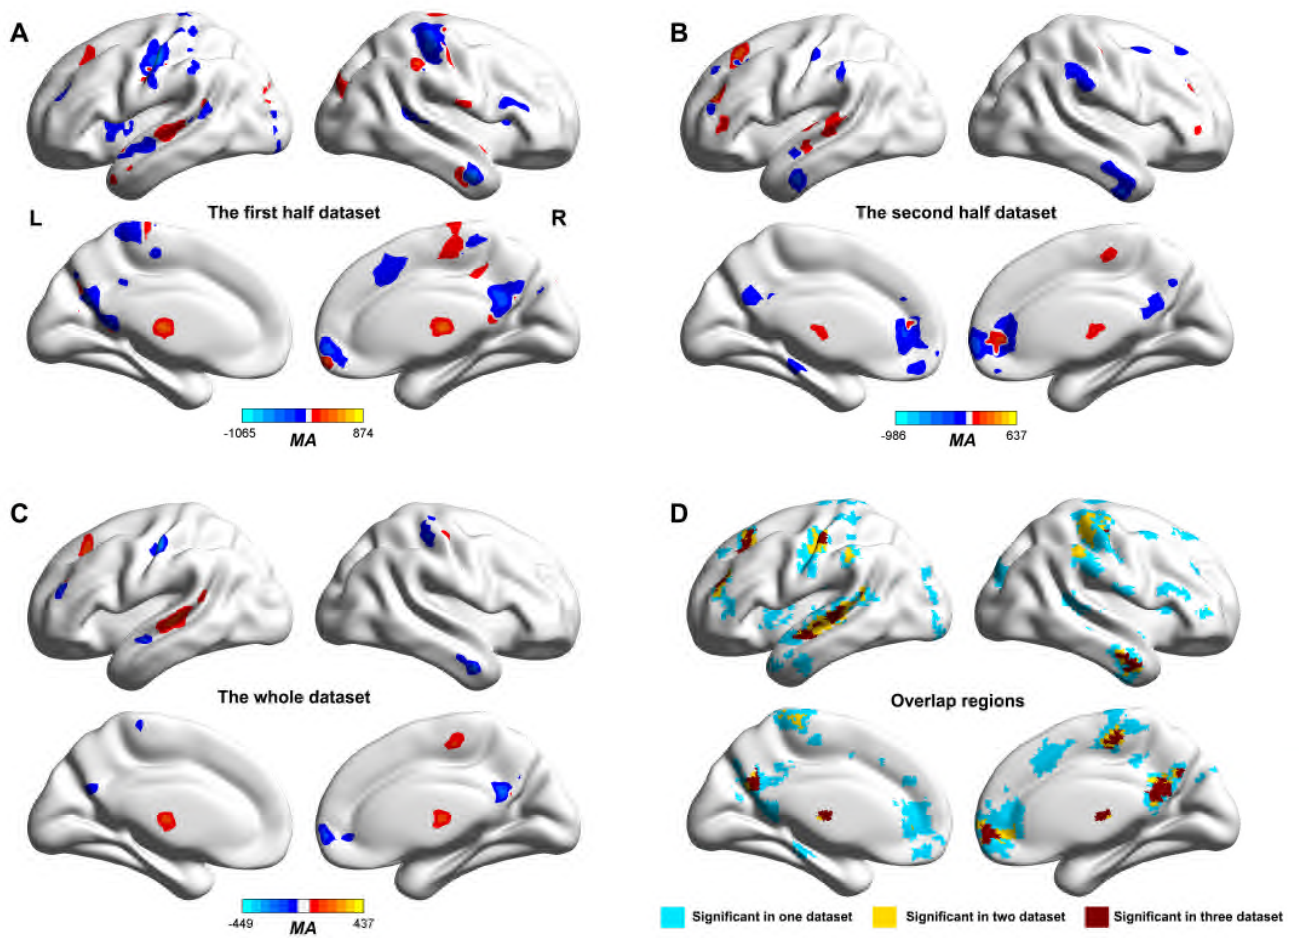

**Figure S4.** The robustness of ROI-wise analysis. A) The pattern of altered functional connectivity of the first half dataset. The functional connectivity matrix calculated from the BOLD signals in ROIs identified by the first half dataset. B) The pattern of altered functional connectivity of the second half dataset based on the ROIs identified by the first half dataset. C) The correlation of statistics (ROI-wise two-sample t test) between the two datasets. Although the ROIs were defined by the first half dataset, the functional connectivity among those ROIs was also significantly different between the autistic and control populations in the second half dataset in a very similar manner. D, E, F) A similar result to that above. When we used the second half dataset to find the significant ROIs, the first dataset also show similar changed patterns.

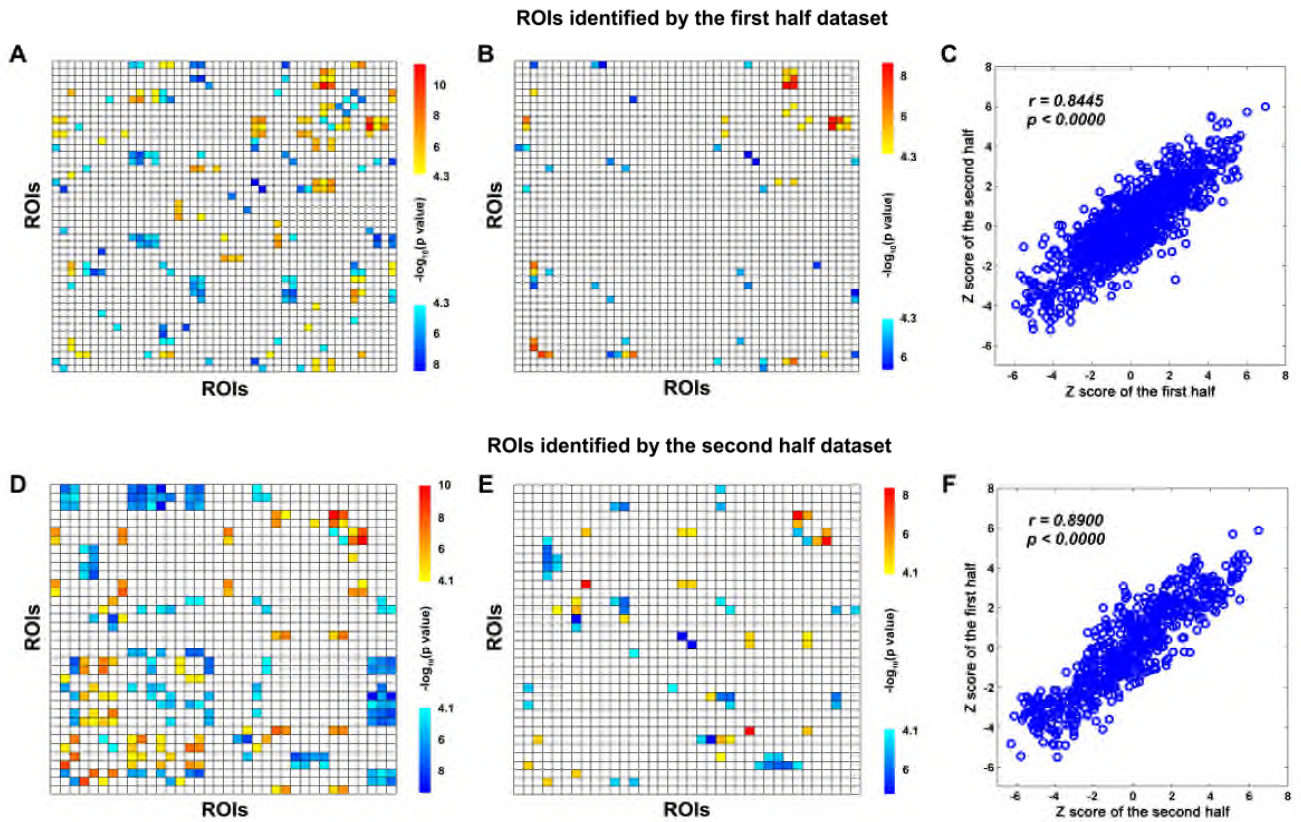

**Figure S5.** The robustness of classification. A) The first dataset was used to identify the significant ROIs and train the SVM classifier, then the second dataset was used to test classification accuracy of the trained model. B) The second dataset was used to identify the significant ROIs and train the SVM classifier, then the first dataset was used to test classification accuracy of the trained model.

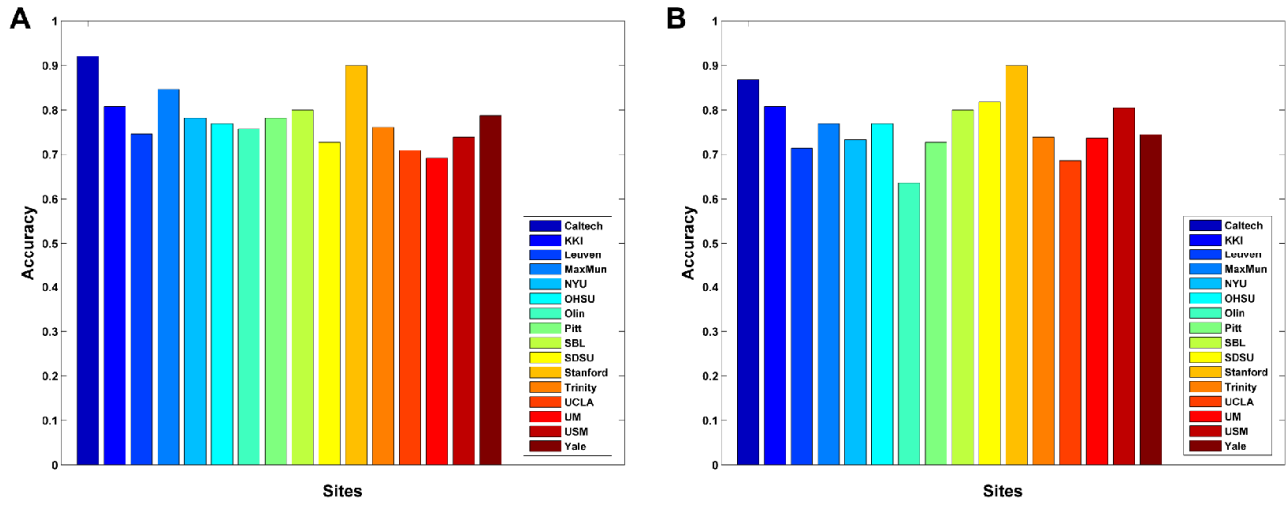

Figure S6. Comparison between the results with (A) and without (B) the global signal.

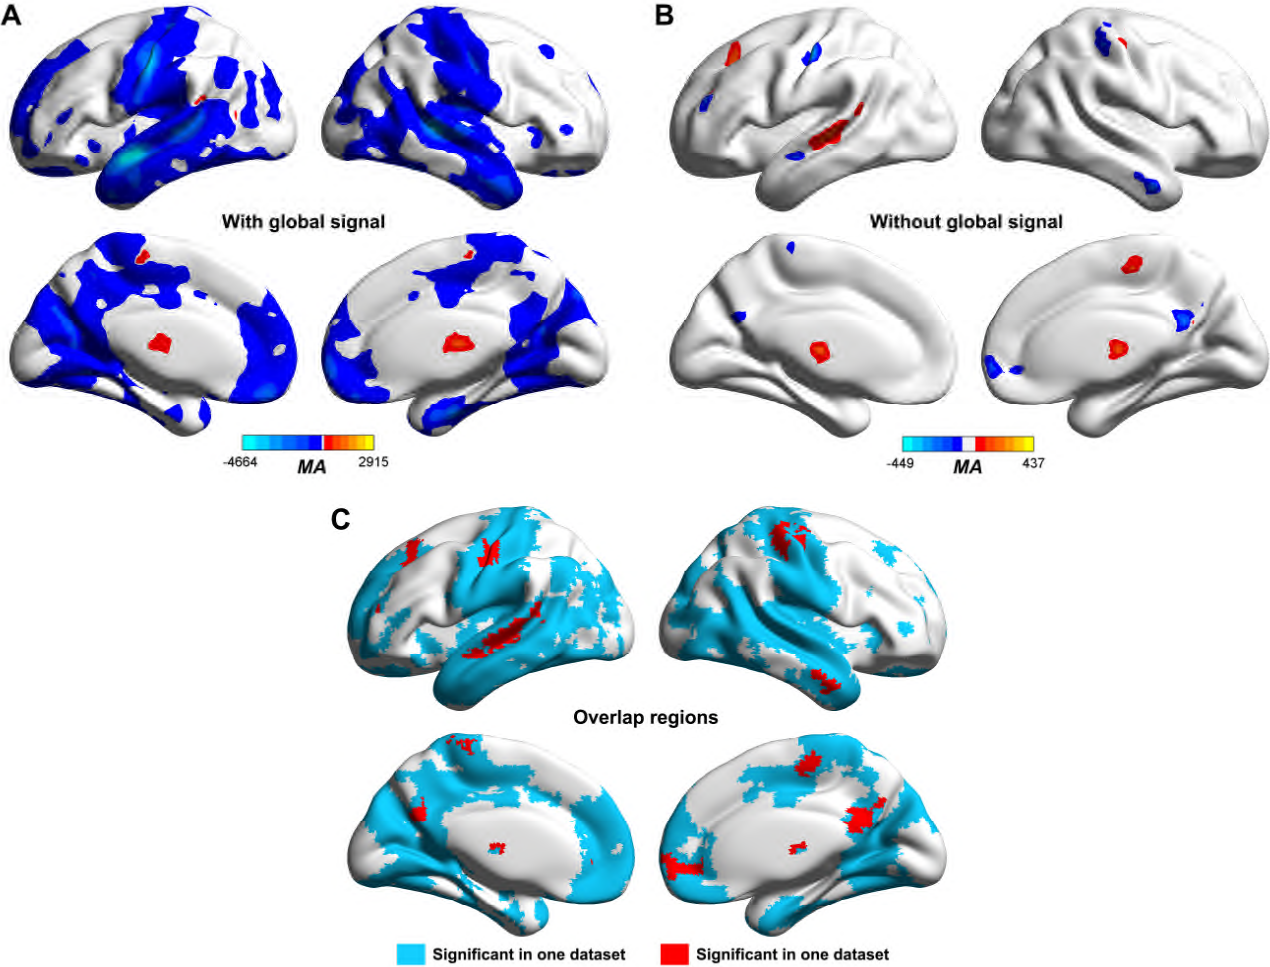

**Figure S7.** Forest plots showing a meta-analysis of the association of the significant functional connectivities (top 15 links) with autism. We can see that the altered patterns of functional connections were consistent across the datasets from the 16 different imaging centers.

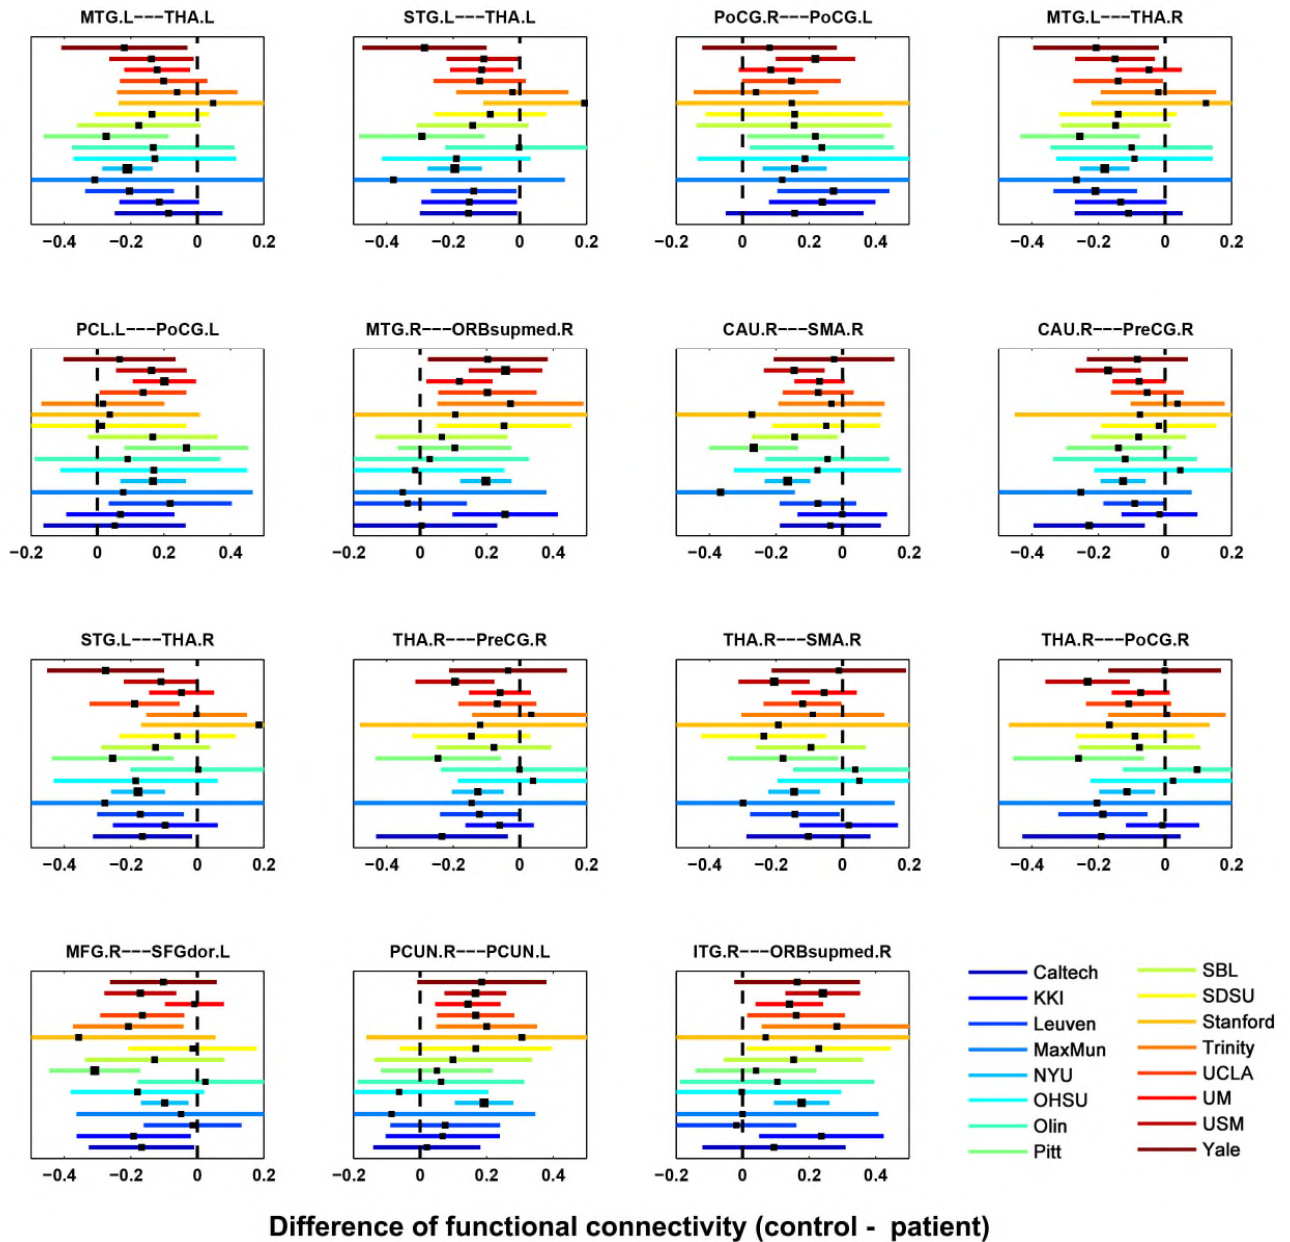

**Figure S8.** The pair-wise voxel-level functional connectivity that was different between the autistic group and the control group. Each connecting line is a link between two voxels that was different in the autistic and control group. The colors are chosen to be different for links between the different AAL regions. The abbreviations for each brain region are in Table S2.

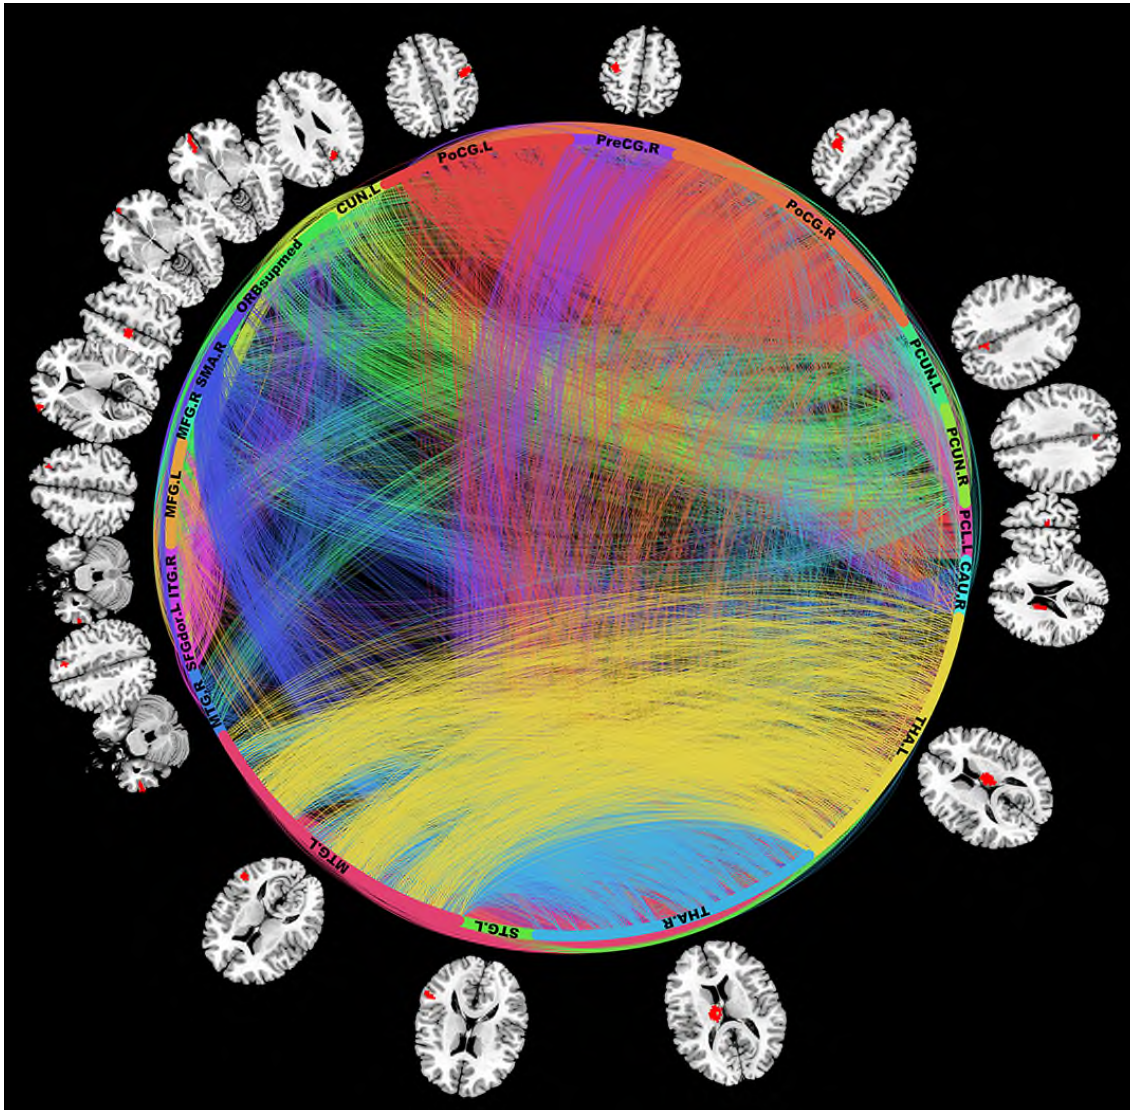

Supplement: SuppMatAutism.pdf [file SuppMatAutism.pdf]
